# 1 **Genomic adaptation of giant viruses in polar oceans**

2 Lingjie Meng<sup>1</sup>, Tom O. Delmont<sup>2,3</sup>, Morgan Gaïa<sup>2,3</sup>, Eric Pelletier<sup>2,3</sup>, Antonio Fernández-  
3 Guerra<sup>4,5</sup>, Samuel Chaffron<sup>3,6</sup>, Russell Y. Neches<sup>1</sup>, Junyi Wu<sup>1</sup>, Hiroto Kaneko<sup>1</sup>, Hisashi  
4 Endo<sup>1</sup>, Hiroyuki Ogata<sup>1,\*</sup>

## 6 **Affiliations:**

7 1. Bioinformatics Center, Institute for Chemical Research, Kyoto University, Gokasho, Uji,  
8 611-0011, Japan

9 2. Génomique Métabolique, Genoscope, Institut François Jacob, CEA, CNRS, Univ Evry,  
10 Université Paris-Saclay, F-91057 Evry, France

11 3. Research Federation for the study of Global Ocean systems ecology and evolution,  
12 FR2022/Tara GOsee, F-75016 Paris, France

13 4. Microbial Genomics and Bioinformatics Research G, Max Planck Institute for Marine  
14 Microbiology, Bremen, Germany

15 5. Lundbeck Foundation GeoGenetics Centre, GLOBE Institute, University of Copenhagen,  
16 Copenhagen, Denmark

17 6. Nantes Université, École Centrale Nantes, CNRS, LS2N, UMR 6004, F-44000 Nantes,  
18 France

19

20 *\*Corresponding author:*

21 Hiroyuki Ogata (E-mail: [ogata@kuicr.kyoto-u.ac.jp](mailto:ogata@kuicr.kyoto-u.ac.jp), Phone: +81-774-38-3270)

22

23

24 Despite being perennially frigid, polar oceans form an ecosystem hosting high and unique  
25 biodiversity. Various organisms show different adaptative strategies in this habitat, but how  
26 viruses adapt to this environment is largely unknown. Viruses of phyla *Nucleocytoviricota* and  
27 *Mirusviricota* are groups of eukaryote-infecting large and giant DNA viruses with genomes  
28 encoding a variety of functions. Here, by leveraging the Global Ocean Eukaryotic Viral  
29 database, we investigate the biogeography and functional repertoire of these viruses at a global  
30 scale. We first confirm the existence of an ecological barrier that clearly separates polar and  
31 nonpolar viral communities, and demonstrate that temperature drives dramatic changes in the  
32 virus–host network at the polar/nonpolar boundary. Ancestral niche reconstruction suggests  
33 that adaptation of these viruses to polar conditions has occurred repeatedly over the course of  
34 evolution, with polar-adapted viruses in the modern ocean being scattered across their  
35 phylogeny. Numerous viral genes are specifically associated with polar adaptation, although  
36 most of their homologues are not identified as polar-adaptive genes in eukaryotes. These results  
37 suggest that giant viruses adapt to cold environments by changing their functional repertoire,  
38 and this viral evolutionary strategy is independent of the polar adaptation of their hosts.

39

## 40 **Main**

41 Polar regions are recognized as among the coldest environments on Earth, with strong  
42 seasonal variations in light cycles. Nevertheless, these regions could nourish a diverse range of  
43 creatures, from microscopic organisms to large animals, thanks to the primary production by  
44 phytoplankton. Organisms adapted to polar environments exhibit distinctive physiological or  
45 morphological characteristics, which augment their fitness in these extreme but lush  
46 environments. For example, polar bears show characteristic morphological traits whose  
47 underlying genetic variations occurred in their ancestral gene pools<sup>1</sup>. Both Arctic and Antarctic  
48 fishes encode antifreeze proteins that allow them to maintain physiological activity in cold

49 waters<sup>2,3</sup>, while some psychrophilic bacteria produce oxygen-scavenging enzymes or modify  
50 their membrane fatty acid composition<sup>4,5</sup>.

51         How do viruses adapt to polar environments? In the ocean, viruses are the most  
52 abundant biological entities<sup>6</sup> and play important roles in the regulation of microbial host  
53 communities, carbon and nutrient cycling, and horizontal gene transfer among organisms<sup>7–10</sup>.  
54 Recent metagenomic studies have revealed that both Arctic<sup>11,12</sup> and Antarctic<sup>13,14</sup> environments  
55 harbour diverse viruses, with an elevated diversity of prokaryotic dsDNA viruses in the Arctic  
56 Ocean<sup>11</sup>. A large proportion of Arctic-specific genes from these viruses were suggested under  
57 positive selection based on their mutation patterns. This implied a role for gene repertoire in  
58 viral adaptation, although most of those genes were of unknown function. It is also known that  
59 phylogenetically closely related viruses can display different responses in their infection  
60 dynamics to varying temperature<sup>15,16</sup>, suggesting that virus–host systems adapt to thermal  
61 changes. Another study showed that a prokaryotic virus reduced its genome in response to  
62 decreased culture temperature<sup>17</sup>. These studies imply possible adaptive mechanisms of viruses  
63 to low temperature or polar ecosystems. However, our knowledge on such viral adaptations is  
64 still limited.

65         In our previous study, we revealed a remarkable shift in the community composition of  
66 eukaryotic dsDNA viruses from nonpolar to polar biomes<sup>18</sup>. These viruses, classified in phylum  
67 *Nucleocytoviricota* (“giant viruses”), are known for their large genomes encoding hundreds to  
68 thousands of genes<sup>19,20</sup>. These viruses are ancient<sup>21</sup>, diverse<sup>22,23</sup>, abundant<sup>24,25</sup>, and active<sup>26</sup> in  
69 the ocean. Despite the existence of a clear polar/nonpolar barrier for these viruses, the  
70 underlying genomic and ecological mechanisms are unknown. How frequently these viruses  
71 have crossed this polar barrier over evolutionary time also remains unclear. As the genomes of  
72 *Nucleocytoviricota* dynamically evolve by losing and gaining different functions<sup>19,27</sup>, we  
73 hypothesized that adaptation to polar environments impacts their gene repertoire.

74           In this study, we investigated genomes of eukaryotic large DNA viruses to characterize  
75 their genome-level adaptations to polar environments. We leveraged recently reconstructed  
76 viral and eukaryotic environmental genomes from the multidisciplinary *Tara* Oceans  
77 international research project<sup>28,29</sup>. The viral genomic data include environmental genomes of  
78 viruses from phylum *Nucleocytoviricota* and a recently discovered phylum, *Mirusviricota*<sup>28</sup>.

79           We first assess the existence of a polar barrier for giant viruses by analysing viral  
80 community composition and by computing robust temperature optima for viruses and their  
81 predicted hosts. We then perform ancestral state reconstruction for polar and nonpolar niches  
82 along the phylogenomic tree of these viruses to quantitatively estimate the adaptive  
83 evolutionary events. Finally, we delineate the functions that are specific to “polar” viruses and  
84 present evidence that viral genomic adaptation to low temperature is independent from the  
85 adaptation of their hosts.

86

## 87 **Results and Discussion**

### 88 **Polar barrier for giant viruses**

89           We investigated the biogeography of giant virus genomes from the Global Ocean  
90 Eukaryotic Viral (GOEV) database<sup>28</sup>. Their abundance profiles across *Tara* Oceans samples  
91 from different size fractions (Supplementary Fig. 1a,b; Supplementary Table 1) revealed 1,380  
92 viral genomes that showed signals (>25% of the genome length was mapped by reads, see  
93 methods in our previous paper<sup>28</sup>) in at least one sample out of 928 samples (The details of  
94 biogeography were in the supplementary text; Supplementary Fig. 1-3). The presence/absence  
95 distribution of viral genomes across biomes revealed a large number of genomes specific to  
96 the Polar biome. Out of 569 genomes detected in polar regions, 262 (46.05%) were exclusive  
97 to the Polar biome (Supplementary Fig. 4a). Accordingly, biome-based classification of viral  
98 communities (i.e., Polar, Coastal, Trades, and Westerlies) had significant explanatory power

99 for community variation (Supplementary Fig. 4b,c; ANOSIM,  $P < 0.01$ ). The  $R$  value increased  
100 from 0.4021 to 0.6141 after merging three nonpolar biomes, demonstrating the existence of a  
101 clear polar barrier for giant virus communities. The viral communities of Arctic regions were  
102 also characterized by their relatively high abundances showing peaks in cumulative coverage  
103 plots for different size fractions (Supplementary Fig. 1b). The major groups of viruses in this  
104 area were *Algavirales*, followed by *Imitervirales* as in other areas of the ocean (Supplementary  
105 Fig. 2c).

106 We inferred a virus–plankton network through co-occurrence analysis to further  
107 characterize the polar barrier in the context of virus-host interaction. In this analysis, we  
108 combined our virus genome data with previously reconstructed marine eukaryotic genome  
109 data<sup>29</sup>. In total, 2,135 virus–eukaryote associations (edges) were inferred in the network, with  
110 the majority (91.94%) of them being positive associations (Fig. 1a; Supplementary Table 3).  
111 Virus–eukaryote pairs with strong associations (edge weight  $\geq 0.4$ ) showed significantly higher  
112 protein similarities between their genomes than those without strong associations (no edges or  
113 edges with weight  $< 0.4$ ) (Wilcoxon rank-sum test,  $P = 1 \times 10^{-13}$ ) (Fig. 1b). Such an increase of  
114 sequence similarity can be due to horizontal gene transfers between viruses and hosts<sup>30,31</sup>,  
115 supporting the prediction of true virus–host relationships in the reconstructed network. A  
116 previous study revealed that the structure of the network for marine eukaryotes and prokaryotes  
117 correlates with the temperature optima of species<sup>32</sup>. By estimating robust temperature optima  
118 for individual viruses and eukaryotes<sup>33</sup>, we identified a strong correlation between the  
119 temperature optima and the structure of the virus–eukaryote network (Fig. 1a). A dramatic  
120 structural change in the network at the temperature-dependent polar/nonpolar boundary is the  
121 source of the uniqueness of polar viral communities.

122 Latitudinal diversity gradients are characterized by relatively low polar and high  
123 temperate biodiversity<sup>34</sup> and are widespread across all ranges of marine microorganisms<sup>35</sup>.

124 Previous studies revealed a similar latitudinal diversity gradient for giant viruses<sup>35</sup>, but not for  
125 prokaryotic dsDNA viruses<sup>11,35</sup> and RNA viruses<sup>36</sup>. In this study, various diversity gradient  
126 patterns were observed among viruses of different size fractions and main taxonomic groups  
127 (Supplementary Fig. 1d; Supplementary Fig. 5). The reasons underlying the Arctic diversity  
128 hotspots for some viruses (e.g., viruses in large size fractions and mirusviruses) may reflect  
129 their host ranges as previously suggested<sup>35</sup>. Notably, eukaryotic nodes (i.e., potential hosts)  
130 associated with viruses showed a pattern distinct from the general diversity gradient trend with  
131 increasing diversity towards high latitudinal regions (Supplementary Fig. 6).

132

### 133 **Potential hosts for polar viruses**

134 A phylogeny-informed filtering method, Taxon Interaction Mapper (TIM)<sup>37,38</sup>, was  
135 applied to the edges of the network to assign predicted host taxa to viral clades. This method  
136 assigned predicted host taxa (five taxa in total) to 34 viral clades (Supplementary Fig. 7a).  
137 These predictions are summarized in Supplementary Fig. 7b and included known virus–host  
138 relationships: *Mesomimiviridae* (from *Imitervirales*) and Phaeocytales<sup>39–41</sup>; *Mesomimiviridae*  
139 and Pelagomonadales<sup>42,43</sup>; and *Prasinovirus* (from *Algavirales*) and Mamiellales<sup>44,45</sup>.

140 Recent discoveries of giant endogenous viral elements (GEVEs) that are widespread  
141 across different eukaryotes demonstrated the impacts of giant viruses' infection on host  
142 genome evolution<sup>46–49</sup>. We systematically analysed insertions of genomes of giant viruses and  
143 their satellite viruses (i.e., virophages) in marine eukaryotic genomes<sup>29</sup>. Among the five  
144 eukaryotic taxa predicted to contain viral hosts, the diatom order Chaetocerotales showed the  
145 largest number of insertion signals of both giant viruses and virophages (Supplementary Fig.  
146 7b), suggesting infection of dsDNA viruses in these diatoms. Because only ssDNA and ssRNA  
147 viruses have been reported to infect species of diatoms<sup>50</sup>, we further analysed draft genomes of  
148 two isolated *Chaetoceros* species<sup>51,52</sup>, revealing three putative GEVEs in *C. tenuissimus* and

149 one GEVE in *C. muelleri*. Two viral DNA polymerase genes detected in the *Chaetoceros*  
150 genomes were phylogenetically placed close to *Asfuvirales* and *Imitervirales* clades  
151 (Supplementary Fig. 7c), corroborating the virus–host relationships of  
152 *Imitervirales*/Chaetocerotales and *Asfuvirales*/Chaetocerotales predicted by our phylogeny-  
153 informed co-occurrence method. Because chaetocerotalid diatoms are abundant and diverse in  
154 both the Arctic and Southern Oceans<sup>53,54</sup>, this unidentified virus–host relationship may account  
155 for the diversity of giant viruses in high-latitude regions.

156

### 157 **Recurrent polar adaptations throughout viral evolution**

158 To investigate viral adaptation across the polar barrier, we assigned ecological niche  
159 categories, either “Polar” or “Nonpolar”, to individual viral genomes. Of 1,380 viral genomes,  
160 450 genomes were classified as Polar, while 818 genomes were classified as Nonpolar (Fig.  
161 2a,b). 111 genomes were labelled “Unknown” because of their ambiguous distribution patterns.  
162 This ecological niche assignment was consistent with the robust temperature and latitude  
163 optima (Supplementary Fig. 8a). We then investigated the niche category assignment in the  
164 phylogenomic tree of viruses and found numerous clades of Polar viruses scattered across the  
165 tree (Fig. 3a). One Polar clade included an Arctic-original metagenome-assembled genome  
166 (MAG) and organic lake phycodnaviruses derived from an Antarctic organic lake<sup>14</sup>  
167 (Supplementary Fig. 8b). *Emiliana huxleyi* viruses, known to occur at high latitudes, were also  
168 assigned to Polar clades. All six genomes of *Proculviricetes*<sup>28</sup>, a recently discovered class-level  
169 group recovered exclusively from the Arctic and Southern Oceans, were classified as Polar  
170 viruses. These examples corroborate the reliability of the ecological niche assignment using  
171 global-scale abundance profiles.

172 We then performed Polar/Nonpolar state reconstruction for ancestral nodes in the tree  
173 using a maximum likelihood approach (see Methods). As a result, 118 Nonpolar-to-Polar and

174 95 Polar-to-Nonpolar niche adaptations were inferred along the branches of the tree (Fig. 2a).  
175 These adaptations thus occurred recurrently throughout the evolution of these viruses starting  
176 from the root of the tree, which was inferred as Nonpolar. Yet, our data could not exclude the  
177 possibility of a polar-origin scenario due to the difficulty in determining the root of the tree of  
178 giant viruses. The divergence of these viruses is estimated to predate the divergence of  
179 eukaryotes<sup>21,23</sup>. Most of the reconstructed niche adaptations occurred relatively recently after  
180 the formation of genera, but some adaptations were inferred to have occurred during the early  
181 stage of evolution, corresponding to order-level divergence (Fig. 2c).

182

### 183 **Polar-specific viral functions and their phylogenetic distributions**

184 Genomic adaptation (i.e., adaptation by alteration of gene repertoire) to polar regions  
185 was investigated based on functions encoded in the viral genomes. We first annotated genes in  
186 the viral genomes with the KEGG Orthologs (KOs). For KOs (n = 1591) that were observed in  
187 more than four genomes, we calculated robust temperature and latitude optima (Supplementary  
188 Table 4). The temperature optima ranged from -1.54 °C to 27.31 °C, and the latitude optima  
189 from 5.25 ° to 78.96 °. The distribution of these values revealed two major groups of KOs: one  
190 distributed in high-latitude/low-temperature regions (n = 314, 19.74%) and another in lower-  
191 latitude/higher-temperature regions (n = 1,277, 80.26%) (Fig. 3a). The 314 Polar-specific  
192 genes had temperature optima below 10 °C and latitude optima above 50 °. The temperature  
193 and latitude optima for conserved core genes of giant viruses were found in the second group,  
194 being distributed at around 13–14 °C and 37–40 °, respectively.

195 We then calculated the phylogenetic diversity of individual KOs using the viral  
196 phylogenomic tree as a reference to assess the breadth of their phylogenetic distribution  
197 (Supplementary Fig. 9a). Overall, Polar-specific KOs showed a relatively low phylogenetic  
198 diversity (median = 6.94) compared with other KOs (median = 9.67) (Wilcoxon rank-sum



199 test,  $P < 0.01$ ), indicating relatively narrow phylogenetic distributions of the Polar-specific  
200 KOs. To further characterize the phylogenetic distributions of the 314 Polar-specific KOs, we  
201 examined the strength of phylogenetic signals in their distribution using a model comparison  
202 approach (see Methods). This analysis revealed that the reference phylogenomic tree has  
203 insufficient explanatory power for the phylogenetic distribution of 193 Polar-specific KOs  
204 (61%) out of the 314 KOs (chi-squared test,  $P < 0.05$ ). It is thus inferred that additional  
205 factors rather than speciation history impacted the phylogenetic distribution of these KOs;  
206 environmental conditions or associated host distributions could be such factors.

207

### 208 **Polar-specific viral functions and metabolic pathways**

209 The proportion of polar-specific KOs (among all genes with KO annotations in a viral  
210 genome) was significantly higher in Polar genomes (15.84% on average) compared to  
211 Nonpolar (6.95%) and Unknown (7.93%) genomes (Supplementary Fig. 9b; Kruskal-Wallis  
212 test,  $P < 0.01$ ). Among Polar-specific KOs, ceramide glucosyltransferase (K00720) and  
213 dihydrofolate reductase (K18589) were exclusively distributed in polar genomes. Ceramide  
214 glucosyltransferase catalyzes sphingolipid glycosylation, indicating the biosynthesis of viral  
215 sphingolipids may improve the fitness of polar viruses<sup>55</sup>. Dihydrofolate reductase could  
216 provide dTMP pools for low GC content viruses, and a possible role of this function is to  
217 facilitate the replication of viruses in the persistent infections<sup>56</sup>. Additionally, nitrate  
218 transporter (K02575) had a high ratio of polar to nonpolar phylogenetic diversity (ratio = 7.96),  
219 thus showing a comparatively wide phylogenetic distribution in Polar genomes. The nitrate  
220 transporter pathway has a role in assimilating extracellular nitrate/nitrite, implying a potential  
221 role for Polar viruses to reprogram host metabolism to fit the nitrate-deficient polar oceans<sup>57</sup>.  
222 Some metabolic functions, including CoA biosynthesis (4'-phosphopantetheinyl transferase)

223 and secondary metabolite biosynthesis (hydroxymandelonitrile lyase and 2-polyprenyl-6-  
224 hydroxyphenyl methylase), also showed a high phylogenetic diversity for Polar genomes.

225 At the pathway level, we found that six pathways were significantly enriched in Polar  
226 KOs (Fig. 3b; Fisher's exact test,  $P < 0.05$ ). Biosynthesis of unsaturated fatty acids, was found  
227 to be the most significantly enriched with polar KOs. A high proportion of unsaturated fatty  
228 acids is known as an adaptive trait for bacteria inhabiting low temperature and high pressure  
229 environment<sup>58</sup>. Giant viruses isolated from high latitude areas are known to encode enzymes  
230 for the biosynthesis of unsaturated fatty acid<sup>41</sup> and may rewire the host physiology of fatty  
231 acid<sup>55</sup>. The N-glycan biosynthesis pathway also had a relatively high ratio of Polar-specific  
232 KOs. N-glycan influences the virus replication cycle, including virus recognition and virus  
233 release<sup>59</sup>. Neuroactive ligand-receptor interaction was the pathway most significantly enriched  
234 with polar specific KOs, implying the ability of polar viruses to regulate signal transduction.  
235 Collectively, these results underscore the importance of membrane-related pathways, including  
236 unsaturated fatty acid and specific membrane-related functions, in polar virus–host interactions.

237

### 238 **Other potential polar adapted functions**

239 In addition to the above statistical analyses based on the temperature and latitude  
240 optima, we performed an enrichment analysis of KOs by examining their presence in Polar and  
241 Nonpolar genomes at different evolutionary scales to capture a variety of situations in the  
242 phylogenetic distributions of KOs. Specifically, this analysis was performed at four different  
243 lineage levels (i.e., root, main group, family, and genus). The analysis revealed 265 functions  
244 that were significantly enriched in Polar genomes inside at least one lineage (Fisher's exact test,  
245  $P < 0.05$ ; Supplementary Table 4). These KOs enriched in Polar viral genomes showed lower  
246 temperature optima than other KOs (Supplementary Fig. 9c; Wilcoxon rank-sum test,  $P < 0.01$ ).  
247 For a finer-grained observation, we focused on one *Mesomimiviridae* clade, containing a

248 similar number of Polar ( $n = 32$ ) and Nonpolar ( $n = 40$ ) genomes scattered in a subtree of the  
249 phylogenomic tree. In this example, four functions were found in more than five genomes from  
250 different Polar clades (Fig. 4a). Three of them (K01627, K00979, K06041) co-occurred in the  
251 same genomes and formed a near-complete CMP–KDO biosynthesis module in the  
252 lipopolysaccharide biosynthesis pathway (Fig. 4b). Lipopolysaccharides are the main  
253 component of the Gram-negative bacterial outer membrane, and enzymes of CMP–KDO  
254 biosynthesis were found in the genome of Cafeteria roenbergensis virus<sup>60</sup>. This result suggests  
255 that the genomes in the examined Polar clade have adapted to the polar environment by coating  
256 virions with bacteria-like glycoconjugate to enhance their interactions with Polar hosts.

257 The KO system can annotate only functionally known genes, and therefore we  
258 calculated robust temperature and latitude optima for gene cluster communities, *de novo*  
259 clusters of viral genes<sup>28</sup>. The result indicated a slightly higher proportion of Polar-specific gene  
260 clusters (26.43%) than obtained by KO annotations (19.74%) (Fig. 4c; Supplementary Fig.  
261 10a), indicating the presence of genes of unknown function that show Polar-specific  
262 distributions. We also found that Polar genomes have a slightly but significantly higher  
263 proportion of Alanine-rich low-complexity regions than Nonpolar and Unknown genomes  
264 (Supplementary Fig. 9d; Dunn's test,  $P < 0.05$ , following a significant Kruskal-Wallis test,  $P =$   
265 0.0002). These low-complexity sequences potentially have an anti-freeze function, as alanine-  
266 rich helical structure is one of the significant characteristics of type I antifreeze proteins for ice  
267 growth inhibition<sup>61</sup>. Additionally, the proportion of Polar viral genomes that encoded antifreeze  
268 protein homologs ( $n = 7$ , 1.6%) was higher than the genomes of other groups ( $n = 6$ , 0.65%),  
269 although the difference was not statistically significant ( $P > 0.05$ ).

270

271 **Polar-specific functions in microbial-eukaryotes**

272 Finally, to examine whether genomic adaptation occurs in eukaryotic plankton in polar  
273 regions and to test if the adaptation is related to the one in viruses, we calculated the  
274 temperature and latitude optima for KOs (n = 11,988) assigned to genes in eukaryotic genomes.  
275 A similar pattern of Polar and Nonpolar KO groups was identified, although the proportion of  
276 the Polar KO group (n = 523, 4.36%) was much smaller than that for viruses (19.74%) (Fig.  
277 4c; Supplementary Fig. 10b). Interestingly, of the 523 KOs in the eukaryotic Polar group, only  
278 four were found in the viral Polar group. These were PPM family protein phosphatase, L-  
279 galactose dehydrogenase, transcription factor S, and ATP-dependent DNA helicase DinG. This  
280 result indicates that most Polar viral functions do not exhibit the same temperature/latitude  
281 optima seen in eukaryotic genomes. The result further suggests that virus–host horizontal gene  
282 transfer is not the primary driver of viral polar adaptation, and that genomic adaptations are  
283 uncoupled between viruses and eukaryotes.

284

## 285 **Conclusions**

286 Functional repertoire is considered an important trait for the adaptation of organisms.  
287 Previous discoveries of functionally related genes in viruses<sup>55,62</sup> indicated that functional  
288 repertoire could also be important for adaptive evolution of viruses. However, this has rarely  
289 been addressed for large and giant DNA viruses at a wide geographic scale as compared with  
290 cellular organisms. Thanks to the recent progress in metagenomics, we investigated the links  
291 between the biogeography, host types, and gene repertoire of viruses infecting marine  
292 eukaryotes. We confirmed the existence of a strong polar/nonpolar barrier for these viruses and  
293 revealed size fraction-dependent Arctic diversity hotspots for some virus groups, which may  
294 reflect a high diversity of their hosts in cold environments. Temperature was an important  
295 factor that shaped the virus–host interactions of polar environments. Consistent with these  
296 findings, our analyses suggested a presently unidentified virus–host relationship between polar

297 diatoms and giant viruses. Our phylogenomic tree and ancestral state reconstruction revealed  
298 back-and-forth adaptations between lower- and higher-temperature niches that occurred  
299 recurrently throughout the long evolutionary course of these viruses. Numerous functions,  
300 especially ones related to host interactions, were found to be specific to viral polar adaptation,  
301 but most of them were not identified as polar-specific functions in eukaryotes. Furthermore,  
302 the gene repertoire of these large DNA viral genomes appears more evolutionarily flexible and  
303 responsive to temperature change than that of eukaryotic genomes. The discovery of this  
304 difference in gene repertoire between polar and nonpolar viruses infecting marine eukaryotes  
305 prompts concern about the influence of climate warming on the marine ecosystem, given the  
306 importance of these viruses in regulating their host communities and biogeochemical cycling.  
307

## 308 **Methods**

### 309 **Global Ocean Eukaryotic Viral (GOEV) database**

310 Metagenomic datasets and environmental data are provided in Supplementary Table 1.  
311 The Global Ocean Eukaryotic Viral (GOEV) database contained 1,817 viral genomes<sup>28,30,63</sup>.  
312 Taxonomic inference, read mapping, gene call and gene annotation of the GOEV were  
313 performed in a previous work<sup>28</sup>. 1380 detected viruses were classified into six main taxonomic  
314 groups: five orders (i.e., *Algavirales*, *Asfuvirales*, *Imitervirales*, *Pandoravirales*, and  
315 *Pimascovirales*) and the newly discovered phylum, *Mirusviricota*. Six different size fractions  
316 were used in this study: 0.22–1.6 µm or 0.22–3.0 µm (“Pico”), 0.8–5 µm (“Piconano”), 5–20  
317 µm (“Nano”), 20–200 µm (“Micro”), 200–2,000 µm (“Macro”), and 0.8–2,000 µm (“Broad”).  
318 The size fraction below 0.22 µm was excluded in this study because of the low relative  
319 abundance and high overlap with species from the Pico size fraction. Mean coverage of these  
320 viruses was transformed into RPKM (Reads Per Kilobase of exon per Million mapped reads)  
321 using the formula:  $\text{numReads} / (\text{genomeLength}/1000 * \text{totalNumReads}/1,000,000)$ . RPKM  
322 profile was used for the ecological analyses in this study.

323

### 324 **Phylogenetic tree construction**

325 Phylogenetic trees used in this study were reconstructed using IQ-TREE v.1.6.2<sup>64</sup>. The  
326 viral species tree was reconstructed with the site-specific frequency PMSF model following a  
327 best-fitting model according to the BIC from the ModelFinder Plus option. The PolB tree was  
328 of *Nucleocytoviricota* reference genomes and *Chaetoceros* genomes was reconstructed with  
329 the LG+F+I+G4 model. Tree structure manipulation and analysis were done using ETE3  
330 toolkit v.3.1.1<sup>65</sup>. iTOL v.6 was used to visualize the phylogenetic trees<sup>66</sup>. Phylogenetic  
331 diversity was calculated using the ‘pd’ function in the R package ‘picante’<sup>67</sup> for polar and  
332 nonpolar genome subsets.

333

## 334 **Ecological analyses**

335 Diversity analyses were performed using R v.4.0.1<sup>68</sup> in Rstudio v.1.3.959<sup>69</sup>. To evaluate  
336 the diversity of each sample, the richness (number of MAGs), Shannon's index and Pielou's  
337 evenness were calculated with the package 'vegan'<sup>70</sup>. Compositional variation among  
338 samples was assessed with a non-metric multidimensional scaling (NMDS) ordination based  
339 on Bray-Curtis dissimilarity. Samples with low viral abundance and richness produce outliers  
340 that reduce the readability of the NMDS ordination plot. To avoid such a bias, samples for  
341 which the sum of cumulative coverage was less than 10 or richness was less than 5 (set as the  
342 cutoff threshold) were removed from the compositional variation analyses. Statistical  
343 significance of differences among the sample groups (size fractions and biomes) was tested  
344 using an ANOSIM (analysis of similarities) with 9,999 permutations. The significance  
345 threshold was set to a *p*-value of 0.01. The plots and maps of sampling stations were generated  
346 by packages 'ggplot2'<sup>71</sup> and 'rgdal'<sup>72</sup>.

347

## 348 **Gene annotation and clustering**

349 Genes were predicted using Prodigal v.2.6.3<sup>73</sup> within anvi'o v6.1<sup>74</sup> with the default  
350 parameters. Gene cluster communities were classified through the AGNOSTOS<sup>75</sup> workflow.  
351 Those two steps were performed and described in a previous work<sup>28</sup>. For functional annotation,  
352 genes were assigned to KEGG Orthologs (KOs) using eggNOG-mapper v.2.1.5<sup>76</sup> ("Diamond"  
353 with an E-value cut-off of  $1.0 \times 10^{-5}$ ). Viral marker genes were searched with in-house HMM  
354 profiles from NCVOG (nucleocytoplasmic virus orthologous genes)<sup>77</sup> and GVOG (giant virus  
355 orthologous groups)<sup>22</sup> databases using HMMER v.3.2.1 (<http://hmmer.org>) with an E-value of  
356  $1 \times 10^{-3}$ .<sup>78</sup> Antifreeze proteins were detected using InterProScan v.5.44-79.0<sup>78</sup>. Low-complexity

357 regions of protein sequences were identified using the option ‘-qmask seg’ in usearch  
358 v.11.0.667<sup>79</sup>.

359

### 360 **Virus–plankton interaction network**

361 We determined the relative abundance matrix for the virus MAGs from the Pico size  
362 fractions and relative abundance matrices for eukaryotic MAGs from five cellular size fractions  
363 (Piconano, Nano, Micro, Macro, and Broad). To create the input files for network inference,  
364 we combined the viral matrix with each of the eukaryotic matrices (corresponding to different  
365 size fractions), and only the samples represented by both viral and eukaryotic MAGs were  
366 placed in new files. Relative abundances in the newly-generated matrices were normalized  
367 using centred log-ratio (*clr*) transformation after adding a pseudo-count of one to all matrix  
368 elements because zero cannot be transformed in *clr*. Normalization and filtering were  
369 separately applied to viral and eukaryotic MAGs. We then removed the MAGs that had fewer  
370 than three sample observations. Network inference was performed using FlashWeave  
371 v.0.15.0<sup>80</sup> with Sensitive mode to set a threshold of  $\alpha < 0.01$  as the statistical significance and  
372 without the default normalization step. All detected pairwise associations were then assigned  
373 a weight that ranged between  $-1$  and  $+1$ . The network was visualized with Cytoscape v.3.7.1<sup>81</sup>  
374 using the prefuse force-directed layout. Proteins between linked genome pairs were aligned  
375 using BlastP in Diamond v.2.0.6<sup>82</sup> with an E-value cut-off of  $1.0 \times 10^{-50}$ .

376

### 377 **Host prediction**

378 First, we pooled network associations from five size fractions by keeping the best positive  
379 or negative associations (i.e., the edges with the highest absolute weights). We used a  
380 phylogeny-guided filtering approach, Taxon Interaction Mapper (TIM)<sup>37</sup>, to predict the host  
381 using the global nucleocytoplasmic large DNA virus (NCLDV)–eukaryote network. TIM



382 provides a list of nodes in the viral tree and associated NCBI taxonomies (order, class, and  
383 phylum) of eukaryotes that show significant enrichment in the leaves under the nodes. All the  
384 virus–eukaryote associations were mapped on the viral phylogenetic tree to calculate the  
385 significance of the enrichment of specific associations using TIM, and the result was visualized  
386 with iTOL v.6.

387

### 388 **Endogenous viral signals**

389 We searched the viral signals in 713 genomes from the eukaryotic environmental genomes  
390 database using VirSorter2 v.2.2.3<sup>29,83</sup>. Both NCLDV and *Lavidaviridae* (virophage) genomic  
391 insertions (or co-binning) were searched using --min-score 0.85 and 0.95 for NCLDV and  
392 virophage, respectively. We next obtained long-read assembled genomes of two *Chaetoceros*  
393 isolates, *C. muelleri*<sup>52</sup> and *C. tenuissimus*<sup>51</sup>. Giant Endogenous Viral Elements (GEVEs) were  
394 detected using ViralRecall v.2.1 (-s 5 -w 10)<sup>84</sup>. *Nucleocytoviricota* DNAPolB sequences in  
395 *Chaetoceros* genomes were detected using HMMER v.3.2.1 search against an in-house  
396 DNAPolB database. *Chaetoceros*-originating DNAPolB sequences were manually  
397 concatenated if they were in the same contig and had continuous gene IDs. *Chaetoceros*-  
398 originating DNAPolBs were aligned with other reference NCLDV DNAPolBs using MAFFT-  
399 linsi v.7.453<sup>85</sup>, and the phylogenetic tree was constructed using IQ-TREE as described above<sup>64</sup>.

400

### 401 **Size index**

402 Each *Tara* Oceans metagenome corresponds to a specific filtering size fraction (Pico,  
403 Piconano, Nano, Micro, Macro, and Broad size fractions as defined above), which were sorted  
404 as a list by increasing size. An index constant was set for each size fraction from small to large:  
405 Pico = 1, Piconano & Broad = 2, Nano = 3, Micro = 4, Macro = 5 (the Broad and Piconano  
406 size fractions were merged because of their similar relative abundances and lack of Arctic

407 samples for the Piconano fraction). We calculated the size index for a given genome by first  
408 multiplying the RPKM of the genome in a sample by the corresponding index constant, then  
409 dividing the sum of the products by the overall sum of the RPKMs of the genomes from all  
410 samples.

411

## 412 **Biome and size niche**

413 Each sample was associated with one specific marine biome (Coastal, Trades, Westerlies,  
414 or Polar). To investigate the difference between polar and nonpolar regions, we pooled Coastal,  
415 Trades, and Westerlies samples as “Nonpolar”. First, we assigned each genome to Polar or  
416 Nonpolar if a genome was exclusive to either nonpolar or polar biomes. Additionally, on the  
417 basis of RPKM profiles, we calculated the significance using the Wilcoxon rank-sum test.  
418 Adjustments for multiple testing were performed using the Benjamini-Hochberg (BH). The  
419 significance threshold was set to a corrected *P*-value of 0.05. Similar assignments were  
420 performed for two size fractions: intercellular (Pico-size) and intracellular (Piconano, Nano,  
421 Micro, Macro, and Broad).

422

## 423 **Robust ecological optimum and tolerance**

424 We calculated the robust ecological optimum for a genome (or a gene), which reflects the  
425 optimal living condition regarding a given environmental parameter and a tolerance range  
426 around this optimum defined by lower and upper bounds<sup>32,33</sup>. For each genome (or a gene), we  
427 computed the proportion of RPKM in a given sample relative to the sum of RPKM over all  
428 samples. We then used these proportions to populate a weighted vector of a fixed size ( $n =$   
429 10,000) with environmental values accordingly. The ecological optimum is then defined as the  
430 median value ( $Q_2$ ) of this vector, and the tolerance (niche) range is given by the interquartile  
431 range ( $Q_3$  to  $Q_1$ ; some environmental parameter values were missing [nonavailable (NA)] for

432 some samples). To avoid inferring spurious ecological optima and tolerance ranges for  
433 genomes (or genes) for which there were many missing values, we set a minimum threshold of  
434 10 observations with non-NAs and a minimum fraction of 30% non-NA values.

435

#### 436 **Ancestral states estimation and Relative Evolution Divergency**

437 Ancestral states of Nonpolar and Polar viruses were estimated using the function “ace”  
438 (Ancestral Character Estimation) in the R package ‘ape’<sup>86</sup>. The input files were a rooted  
439 phylogenetic tree based on the four-hallmark gene set described above. In the tree, we retained  
440 only viruses with biome assignments of Polar or Nonpolar, and excluded viruses with  
441 “Unknown” biomes. We used `type = “discrete”`, `method = “ML”`, and `model = “ER”` (one-  
442 parameter equal rates model). The ancestral states were analysed based on a series of likelihood  
443 values for Polar and Nonpolar. Relative Evolutionary Divergence (RED) values were  
444 calculated using the “get\_reds” function in the package “castor”<sup>87</sup>.

445

#### 446 **KO enrichment in Polar viral genomes**

447 “Polar”, “Nonpolar”, or “Unknown” biome niche was assigned to each viral genome as  
448 described previously. For individual lineages at four taxonomic levels (root, main group,  
449 family, and genus), the enrichment of a given KO in Polar genomes assessed using Fisher’s  
450 exact test in SciPy v.1.7.1<sup>88</sup>. Adjustments for multiple testing were performed using the  
451 Benjamini-Hochberg (BH). The significance threshold was set to a corrected *P*-value of 0.05.

452

#### 453 **Phylogenetic signal of functions**

454 We hypothesized that the phylogenetic distributions of some polar specific functions  
455 (i.e., “trait distribution”) could be better explained in part by environment selection rather  
456 than only by speciation history. We therefore compared two models, (i) the Brownian motion

457 model (Pagel's  $\lambda = 1$ , used as the null hypothesis in which the distribution of a trait is  
458 simply explained by species tree) and (ii) the Lambda model ( $0 \leq \text{Pagel's } \lambda \leq 1$ ;  $\lambda$   
459  $= 0$  corresponds to the lack of phylogenetic signal in the distribution of a trait), by the  
460 likelihood ratio test using the function "fitContinuous" in an R package "geiger"<sup>89</sup>. The  $p$ -  
461 values to reject the null hypothesis were calculated by assuming chi-squared distribution with  
462 1 d.f. for the likelihood-ratio test statistic and adjusted using the BH procedure. The threshold  
463 was set to a corrected  $p$ -value of 0.05

464

## 465 **Acknowledgements**

466 This work was supported by JSPS/KAKENHI (18H02279 and 22H00384, to H. O.),  
467 and the Collaborative International Joint Research Program of the Institute for Chemical  
468 Research, Kyoto University (No. 2021-29, 2022-26 to T.O.D.; No. 2022-27, to S. C.), and the  
469 H2020 European Commission project AtlantECO (award number 862923, to S. C.).  
470 Computational time was provided by the SuperComputer System, Institute for Chemical  
471 Research, Kyoto University. We further thank the *Tara* Oceans consortium, and the people and  
472 sponsors who supported *Tara* Oceans. *Tara* Oceans (including both the *Tara* Oceans and *Tara*  
473 Oceans Polar Circle expeditions) would not exist without the leadership of the *Tara*  
474 Expeditions Foundation and the continuous support of 23 institutes  
475 (<https://oceans.taraexpeditions.org>). This article is contribution number XXX of *Tara* Oceans.  
476 We thank Gabe Yedid, PhD, from Edanz (<http://jp.edanz.com>) for editing a draft of this  
477 manuscript.

478

## 479 **Author contributions**

480 L. M. and H. O. designed the study. L. M. performed the primary biogeographical analysis.  
481 T.O.D completed the genome-resolved metagenomic analysis. M. G. performed phylogenomic

482 analyses. E. P. generated the reads mapping data. A. F-G provided de novo clusters of viral  
483 genes. R.Y.N, J. W, H. K. contributed to the bioinformatics analysis. All the authors  
484 contributed to interpreting the data and writing the manuscript.

485

## 486 **Competing interest statement**

487 The authors declare no competing interests.

## 488 References

- 489 1. Alfredo, J., Castruita, S. & Westbury, M. V. Analyses of key genes involved in Arctic  
490 adaptation in polar bears suggest selection on both standing variation and de novo  
491 mutations played an important role. *BMC Genomics* **0**, 1–8 (2020).
- 492 2. DeVries, A. L. & Cheng, C. H. C. Antifreeze Proteins and Organismal Freezing  
493 Avoidance in Polar Fishes. *Fish Physiology* **22**, 155–201 (2005).
- 494 3. Kim, B. M. *et al.* Antarctic blackfin icefish genome reveals adaptations to extreme  
495 environments. *Nat Ecol Evol* **3**, 469–478 (2019).
- 496 4. Methé, B. A. *et al.* The psychrophilic lifestyle as revealed by the genome sequence of  
497 *Colwellia psychrerythraea* 34H through genomic and proteomic analyses. *Proc Natl*  
498 *Acad Sci U S A* **102**, 10913–10918 (2005).
- 499 5. Hassan, N. *et al.* Temperature Driven Membrane Lipid Adaptation in Glacial  
500 Psychrophilic Bacteria. *Front Microbiol* **11**, 1–10 (2020).
- 501 6. Suttle, C. A. Marine viruses - Major players in the global ecosystem. *Nat Rev*  
502 *Microbiol* **5**, 801–812 (2007).
- 503 7. Wilhelm, S. W. & Suttle, C. a. Viruses and Nutrient Cycles in the Sea aquatic food  
504 webs. *Bioscience* **49**, 781–788 (1999).
- 505 8. Guidi, L. *et al.* Plankton networks driving carbon export in the oligotrophic ocean.  
506 *Nature* **532**, 465–470 (2016).
- 507 9. Irwin, N. A. T., Pittis, A. A., Richards, T. A. & Keeling, P. J. Systematic evaluation of  
508 horizontal gene transfer between eukaryotes and viruses. *Nat Microbiol* **7**, 327–336  
509 (2022).
- 510 10. Proctor, L. M. & Fuhrman, J. A. Viral mortality of marine bacteria and cyanobacteria.  
511 *Nature* **343**, 59–597 (1990).
- 512 11. Gregory, A. C. *et al.* Marine DNA Viral Macro- and Microdiversity from Pole to Pole.  
513 *Cell* **177**, 1109-1123.e14 (2019).
- 514 12. Xia, J. *et al.* Tight association between microbial eukaryote and giant virus  
515 communities in the Arctic Ocean. *Limnol Oceanogr* **67**, 1343–1356 (2022).
- 516 13. López-Bueno, A. *et al.* High diversity of the viral community from an Antarctic lake.  
517 *Science (1979)* **326**, 858–861 (2009).
- 518 14. Yau, S. *et al.* Virophage control of antarctic algal host-virus dynamics. *Proc Natl Acad*  
519 *Sci U S A* **108**, 6163–6168 (2011).
- 520 15. Demory, D. *et al.* A thermal trade-off between viral production and degradation drives  
521 virus-phytoplankton population dynamics. *Ecol Lett* **24**, 1133–1144 (2021).
- 522 16. Demory, D. *et al.* Temperature is a key factor in *Micromonas*-virus interactions. *ISME*  
523 *Journal* **11**, 601–612 (2017).
- 524 17. Ogunbunmi, E. T. *et al.* Low-Temperature Adaptation Targets Genome Packing  
525 Reactions in an Icosahedral Single-Stranded DNA Virus. *J Virol* **96**, (2022).
- 526 18. Endo, H. *et al.* Biogeography of marine giant viruses reveals their interplay with  
527 eukaryotes and ecological functions. *Nat Ecol Evol* **4**, 1639–1649 (2020).
- 528 19. Koonin, E. v. & Yutin, N. *Evolution of the Large Nucleocytoplasmic DNA Viruses of*  
529 *Eukaryotes and Convergent Origins of Viral Gigantism. Advances in Virus Research*  
530 vol. 103 (Elsevier Inc., 2019).
- 531 20. Koonin, E. v. & Yutin, N. Origin and evolution of eukaryotic large nucleo-cytoplasmic  
532 DNA viruses. *Intervirology* **53**, 284–292 (2010).
- 533 21. Guglielmini, J., Woo, A. C., Krupovic, M., Forterre, P. & Gaia, M. Diversification of  
534 giant and large eukaryotic dsDNA viruses predated the origin of modern eukaryotes.  
535 *Proc Natl Acad Sci U S A* **116**, 19585–19592 (2019).

- 536 22. Aylward, F. O., Moniruzzaman, M., Ha, A. D. & Koonin, E. v. A phylogenomic  
537 framework for charting the diversity and evolution of giant viruses. *PLoS Biol* **19**, 1–  
538 18 (2021).
- 539 23. Mihara, T. *et al.* Taxon richness of “Megaviridae” exceeds those of bacteria and  
540 archaea in the ocean. *Microbes Environ* **33**, 162–171 (2018).
- 541 24. Monier, A., Claverie, J. M. & Ogata, H. Taxonomic distribution of large DNA viruses  
542 in the sea. *Genome Biol* **9**, R106 (2008).
- 543 25. Hingamp, P. *et al.* Exploring nucleo-cytoplasmic large DNA viruses in Tara Oceans  
544 microbial metagenomes. *ISME Journal* **7**, 1678–1695 (2013).
- 545 26. Carradec, Q. *et al.* A global ocean atlas of eukaryotic genes. *Nat Commun* **9**, 373  
546 (2018).
- 547 27. Schulz, F. *et al.* Giant viruses with an expanded complement of translation system  
548 components. **85**, 82–85 (2017).
- 549 28. Gaïa, M., Meng, L., Pelletier, E., Forterre, P. & Vanni, C. Plankton-infecting relatives  
550 of herpesviruses clarify the evolutionary trajectory of giant viruses. (2022).
- 551 29. Delmont, T. O. *et al.* Functional repertoire convergence of distantly related eukaryotic  
552 plankton lineages abundant in the sunlit ocean. *Cell Genomics* **2**, 100123 (2022).
- 553 30. Schulz, F. *et al.* Giant virus diversity and host interactions through global  
554 metagenomics. *Nature* **578**, 432–436 (2020).
- 555 31. Moniruzzaman, M., Weinheimer, A. R., Martinez-Gutierrez, C. A. & Aylward, F. O.  
556 Widespread endogenization of giant viruses shapes genomes of green algae. *Nature*  
557 **588**, 141–145 (2020).
- 558 32. Chaffron, S. *et al.* Environmental vulnerability of the global ocean epipelagic plankton  
559 community interactome. *Sci Adv* **7**, 1–15 (2021).
- 560 33. Cristóbal, E., Ayuso, S. V., Justel, A. & Toro, M. Robust optima and tolerance ranges  
561 of biological indicators: A new method to identify sentinels of global warming. *Ecol*  
562 *Res* **29**, 55–68 (2014).
- 563 34. Hillebrand, H. On the generality of the latitudinal diversity gradient. *American*  
564 *Naturalist* **163**, 192–211 (2004).
- 565 35. Ibarbalz, F. M. *et al.* Global Trends in Marine Plankton Diversity across Kingdoms of  
566 Life. *Cell* **179**, 1084–1097.e21 (2019).
- 567 36. Dominguez-Huerta, G. *et al.* Diversity and ecological footprint of Global Ocean RNA  
568 viruses. *Science (1979)* **376**, 1202–1208 (2022).
- 569 37. Kaneko, H. *et al.* Eukaryotic virus composition can predict the efficiency of carbon  
570 export in the global ocean. *iScience* **24**, 102002 (2021).
- 571 38. Meng, L. *et al.* Quantitative Assessment of Nucleocytoplasmic Large DNA Virus and  
572 Host Interactions Predicted by Co-occurrence Analyses. *mSphere* **6**, (2021).
- 573 39. Jacobsen, A., Bratbak, G. & Heldal, M. Isolation and characterization of a virus  
574 infecting *Phaeocystis pouchetii* (Prymnesiophyceae). *J Phycol* **32**, 923–927 (1996).
- 575 40. Baudoux, A. C. & Brussaard, C. P. D. Characterization of different viruses infecting  
576 the marine harmful algal bloom species *Phaeocystis globosa*. *Virology* **341**, 80–90  
577 (2005).
- 578 41. Blanc-Mathieu, R. *et al.* A Persistent Giant Algal Virus, with a Unique Morphology,  
579 Encodes an Unprecedented Number of Genes Involved in Energy Metabolism. *J Virol*  
580 **95**, 1–23 (2021).
- 581 42. Moniruzzaman, M. *et al.* Genome of brown tide virus (AaV), the little giant of the  
582 Megaviridae, elucidates NCLDV genome expansion and host-virus coevolution.  
583 *Virology* **466–467**, 60–70 (2014).
- 584 43. Downes Gastrichl, M. *et al.* *Aureococcus Regional Brown Tide anophagefferens*  
585 *Blooms*. vol. 27 (2004).



- 586 44. Cottrell, M. T. & Suttle, C. A. Wide-spread occurrence and clonal variation in viruses  
587 which cause lysis of a cosmopolitan, eukaryotic marine phytoplankter, *Micromonas*  
588 *pusilla*. *Mar Ecol Prog Ser* **78**, 1–9 (1991).
- 589 45. Clerissi, C., Desdevises, Y. & Grimsley, N. Prasinoviruses of the Marine Green Alga  
590 *Ostreococcus tauri* Are Mainly Species Specific. *J Virol* **86**, 4611–4619 (2012).
- 591 46. Moniruzzaman, M., Weinheimer, A. R., Martinez-Gutierrez, C. A. & Aylward, F. O.  
592 Widespread endogenization of giant viruses shapes genomes of green algae. *Nature*  
593 **588**, 141–145 (2020).
- 594 47. Maumus, F. & Blanc, G. Study of gene trafficking between acanthamoeba and giant  
595 viruses suggests an undiscovered family of amoeba-infecting viruses. *Genome Biol*  
596 *Evol* **8**, 3351–3363 (2016).
- 597 48. Armaleo, D. *et al.* The lichen symbiosis re-viewed through the genomes of *Cladonia*  
598 *grayi* and its algal partner *Asterochloris glomerata*. *BMC Genomics* **20**, 1–33 (2019).
- 599 49. Irwin, N. A. T., Pittis, A. A., Richards, T. A. & Keeling, P. J. Systematic evaluation of  
600 horizontal gene transfer between eukaryotes and viruses. *Nat Microbiol* **7**, 327–336  
601 (2022).
- 602 50. Coy, S. R., Gann, E. R., Pound, H. L., Short, S. M. & Wilhelm, S. W. Viruses of  
603 eukaryotic algae: Diversity, methods for detection, and future directions. *Viruses* **10**,  
604 (2018).
- 605 51. Nelson, D. R. *et al.* Large-scale genome sequencing reveals the driving forces of  
606 viruses in microalgal evolution. *Cell Host Microbe* **29**, 250–266.e8 (2021).
- 607 52. Hongo, Y. *et al.* The genome of the diatom *Chaetoceros tenuissimus* carries an ancient  
608 integrated fragment of an extant virus. *Sci Rep* **11**, 1–13 (2021).
- 609 53. Malviya, S. *et al.* Insights into global diatom distribution and diversity in the world’s  
610 ocean. *Proc Natl Acad Sci U S A* **113**, E1516–E1525 (2016).
- 611 54. Nef, C., Madoui, M., Pelletier, É. & Bowler, C. Whole-genome scanning reveals  
612 selection mechanisms in epipelagic *Chaetoceros* diatom populations. 1–39 (2022).
- 613 55. Rosenwasser, S. *et al.* Rewiring host lipid metabolism by large viruses determines the  
614 fate of *Emiliania huxleyi*, a bloom-forming alga in the ocean. *Plant Cell* **26**, 2689–  
615 2707 (2014).
- 616 56. Trimble, J. J., Murthy, S. C. S., Bakker, A., Grassmann, R. & Desrosiers, R. C. A gene  
617 for dihydrofolate reductase in a herpesvirus. *Science (1979)* **239**, 1145–1147 (1988).
- 618 57. Yamamoto-Kawai, M., Carmack, E. & McLaughlin, F. Nitrogen balance and Arctic  
619 throughflow. *Nature* **443**, 43 (2006).
- 620 58. Wirsén, C. O., Jannasch, H. W., Wakeham, S. G. & Canuel, E. A. Membrane lipids of  
621 a psychrophilic and barophilic deep-sea bacterium. *Curr Microbiol* **14**, 319–322  
622 (1986).
- 623 59. Li, Y. *et al.* The Importance of Glycans of Viral and Host Proteins in Enveloped Virus  
624 Infection. *Front Immunol* **12**, 1–12 (2021).
- 625 60. Fischer, M. G., Allen, M. J., Wilson, W. H. & Suttle, C. A. Giant virus with a  
626 remarkable complement of genes infects marine zooplankton. *Proc Natl Acad Sci U S*  
627 *A* **107**, 19508–19513 (2010).
- 628 61. Davies, P. L., Roach, A. H. & Hew, C. L. DNA sequence coding for an antifreeze  
629 protein precursor from winter flounder. *Proc Natl Acad Sci U S A* **79**, 335–339  
630 (1982).
- 631 62. Needham, D. M. *et al.* A distinct lineage of giant viruses brings a rhodopsin  
632 photosystem to unicellular marine predators. *Proc Natl Acad Sci U S A* **116**, 20574–  
633 20583 (2019).



- 634 63. Moniruzzaman, M., Martinez-Gutierrez, C. A., Weinheimer, A. R. & Aylward, F. O.  
635 Dynamic genome evolution and complex virocell metabolism of globally-distributed  
636 giant viruses. *Nat Commun* **11**, 1–11 (2020).
- 637 64. Minh, B. Q. *et al.* IQ-TREE 2: New Models and Efficient Methods for Phylogenetic  
638 Inference in the Genomic Era. *Mol Biol Evol* **37**, 1530–1534 (2020).
- 639 65. Huerta-Cepas, J., Serra, F. & Bork, P. ETE 3: Reconstruction, Analysis, and  
640 Visualization of Phylogenomic Data. *Mol Biol Evol* **33**, 1635–1638 (2016).
- 641 66. Letunic, I. & Bork, P. Interactive tree of life (iTOL) v5: An online tool for  
642 phylogenetic tree display and annotation. *Nucleic Acids Res* **49**, W293–W296 (2021).
- 643 67. Kembel, S. W. *et al.* Picante: R tools for integrating phylogenies and ecology.  
644 *Bioinformatics* **26**, 1463–1464 (2010).
- 645 68. R Core Team. A Language and Environment for Statistical Computing (R Foundation  
646 for Statistical Computing, 2021). (2021).
- 647 69. Team, Rs. RStudio: Integrated Development for R. RStudio, PBC, Boston, MA.  
648 <http://www.rstudio.com/> (2020).
- 649 70. Oksanen, J. *et al.* vegan: Community Ecology Package. R package. version 2.5-3.  
650 <https://CRAN.R-project.org/package=vegan> (2018).
- 651 71. Wickham, H. ggplot2: Elegant Graphics for Data Analysis. *Springer-Verlag New York*  
652 **ISBN 978-3**, (2016).
- 653 72. Bivand, R. *et al.* rgdal: bindings for the geospatial data abstraction library 2017. URL  
654 <https://CRAN.R-project.org/package=rgdal>. R package version 1 (2018).
- 655 73. Hyatt, D. *et al.* Prodigal: prokaryotic gene recognition and translation initiation site  
656 identification. *BMC Bioinformatics* **11**, 1–11 (2010).
- 657 74. Eren, A. M. *et al.* Anvi'o: An advanced analysis and visualization platform for 'omics  
658 data. *PeerJ* **2015**, 1–29 (2015).
- 659 75. Vanni, C. *et al.* Unifying the known and unknown microbial coding sequence space.  
660 *Elife* **11**, 1–60 (2022).
- 661 76. Cantalapiedra, C. P., Hernández-Plaza, A., Letunic, I., Bork, P. & Huerta-Cepas, J.  
662 eggNOG-mapper v2: functional annotation, orthology assignments, and domain  
663 prediction at the metagenomic scale. *Mol Biol Evol* **38**, 5825–5829 (2021).
- 664 77. Yutin, N., Wolf, Y. I., Raouf, D. & Koonin, E. v. Eukaryotic large nucleo-cytoplasmic  
665 DNA viruses: Clusters of orthologous genes and reconstruction of viral genome  
666 evolution. *Virol J* **6**, 1–13 (2009).
- 667 78. Jones, P. *et al.* InterProScan 5: genome-scale protein function classification.  
668 *Bioinformatics* **30**, 1236–1240 (2014).
- 669 79. Edgar, R. C. Search and clustering orders of magnitude faster than BLAST.  
670 *Bioinformatics* **26**, 2460–2461 (2010).
- 671 80. Tackmann, J., Matias Rodrigues, J. F. & von Mering, C. Rapid Inference of Direct  
672 Interactions in Large-Scale Ecological Networks from Heterogeneous Microbial  
673 Sequencing Data. *Cell Syst* **9**, 286-296.e8 (2019).
- 674 81. Paul Shannon *et al.* Cytoscape: A Software Environment for Integrated Models.  
675 *Genome Res* **13**, 426 (2003).
- 676 82. Buchfink, B., Reuter, K. & Drost, H.-G. Sensitive protein alignments at tree-of-life  
677 scale using DIAMOND. *Nat Methods* **18**, 366–368 (2021).
- 678 83. Guo, J. *et al.* VirSorter2: a multi-classifier, expert-guided approach to detect diverse  
679 DNA and RNA viruses. *Microbiome* **9**, 1–13 (2021).
- 680 84. Aylward, F. O. & Moniruzzaman, M. ViralRecall-A Flexible Command-Line Tool for  
681 the Detection of Giant Virus Signatures in 'Omic Data. *Viruses* **13**, 15–17 (2021).

- 682 85. Katoh, K., Misawa, K., Kuma, K. I. & Miyata, T. MAFFT: A novel method for rapid  
683 multiple sequence alignment based on fast Fourier transform. *Nucleic Acids Res* **30**,  
684 3059–3066 (2002).
- 685 86. Paradis, E. & Schliep, K. ape 5.0: an environment for modern phylogenetics and  
686 evolutionary analyses in R. *Bioinformatics* **35**, 526–528 (2019).
- 687 87. Louca, S. & Doebeli, M. Efficient comparative phylogenetics on large trees.  
688 *Bioinformatics* **34**, 1053–1055 (2018).
- 689 88. Virtanen, P. *et al.* SciPy 1.0: fundamental algorithms for scientific computing in  
690 Python. *Nat Methods* **17**, 261–272 (2020).
- 691 89. Pennell, M. W. *et al.* geiger v2. 0: an expanded suite of methods for fitting  
692 macroevolutionary models to phylogenetic trees. *Bioinformatics* **30**, 2216–2218  
693 (2014).
- 694  
695

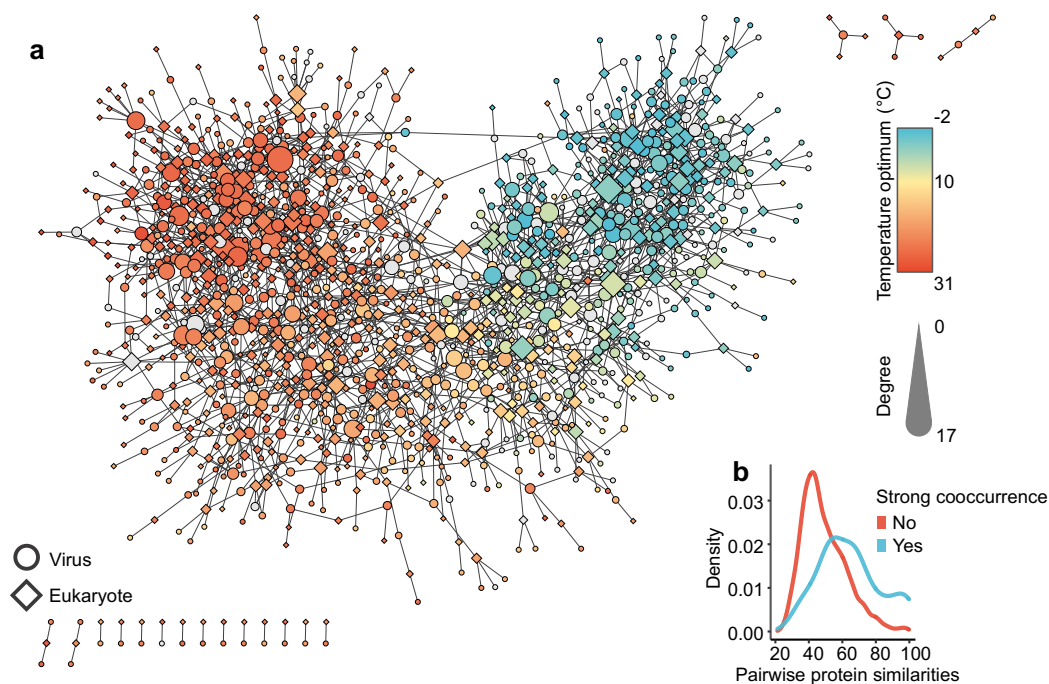

696  
697 **Fig. 1 | Virus–plankton interaction network.** **a**, Five individual networks inferred using input  
698 matrices for the relative frequencies of eukaryotes (five size fractions) and giant viruses (Pico-  
699 size fraction). The best positive or negative association (i.e., the edges with the highest absolute  
700 weights between two genomes) were selected to build the integrated network. Node colour  
701 represents the temperature optima of each genome for viruses and eukaryotes. A total of 1,347  
702 nodes (567 eukaryotes and 780 viruses) are in the network. Of these nodes, 1,191 nodes (554  
703 eukaryotes and 637 viruses) are coloured according to their temperature optima. **b**, The  
704 distribution of pairwise sequence similarity of proteins (one protein from the eukaryotic  
705 genome and one from the viral genome). Blue line indicates the distribution for pairs with a  
706 strong virus–eukaryote association in the network (edge weight of  $\geq 0.4$ ), while the red line is  
707 for pairs lacking a strong association. The two distributions are significantly different ( $P =$   
708  $1 \times 10^{-13}$ , Wilcoxon signed-rank test).  
709

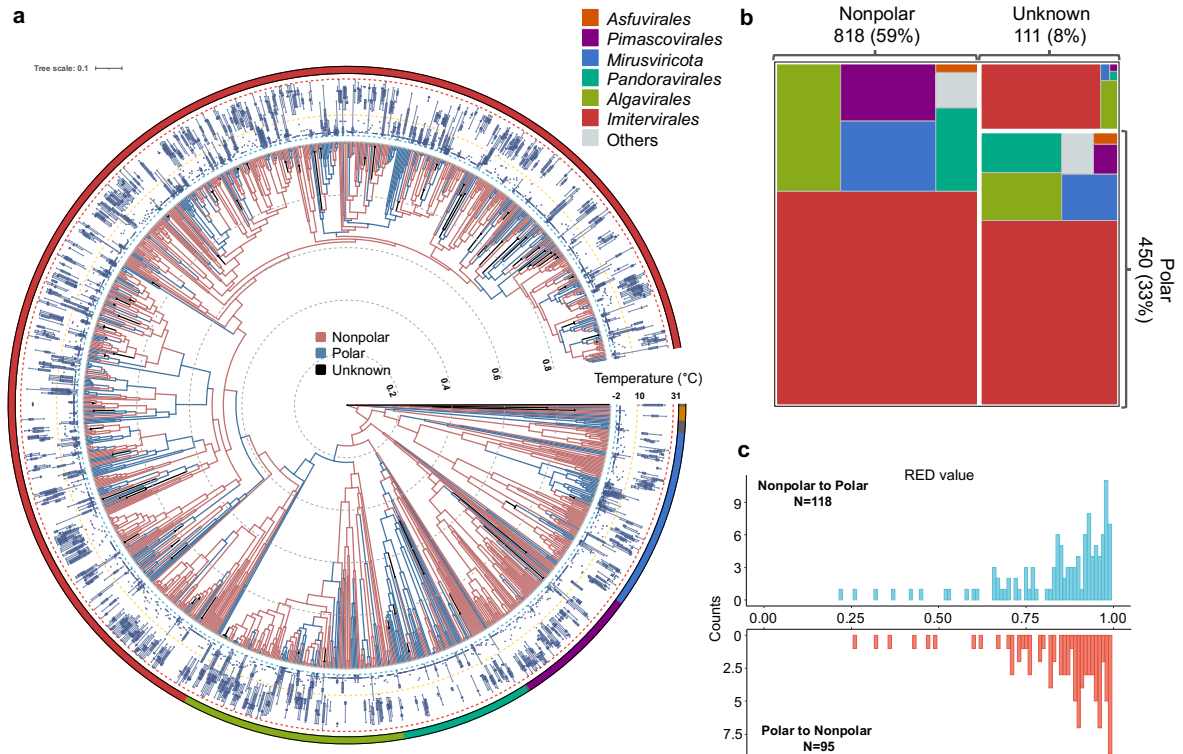

710  
711  
712  
713  
714  
715  
716  
717  
718  
719

**Fig. 2 | Inferred ancestral polar and non-polar niches for viruses.** **a**, Ancestral “Polar” and “Nonpolar” states were estimated using the phylogenetic tree based on a one-parameter equal rates model. The outermost layer shows the taxonomy of six main groups. The boxplots in the second layer show the temperature optima of the viral genomes. Only polar and nonpolar genomes were included in the tree. **b**, The treemap diagram shows the number of viruses assigned to Polar, Nonpolar or “Unknown” biomes. Colours indicate the main taxonomic groups. **c**, Histograms of Relative Evolutionary Divergence (RED) values for the nodes at which “polar” or “nonpolar” adaptation events were inferred.

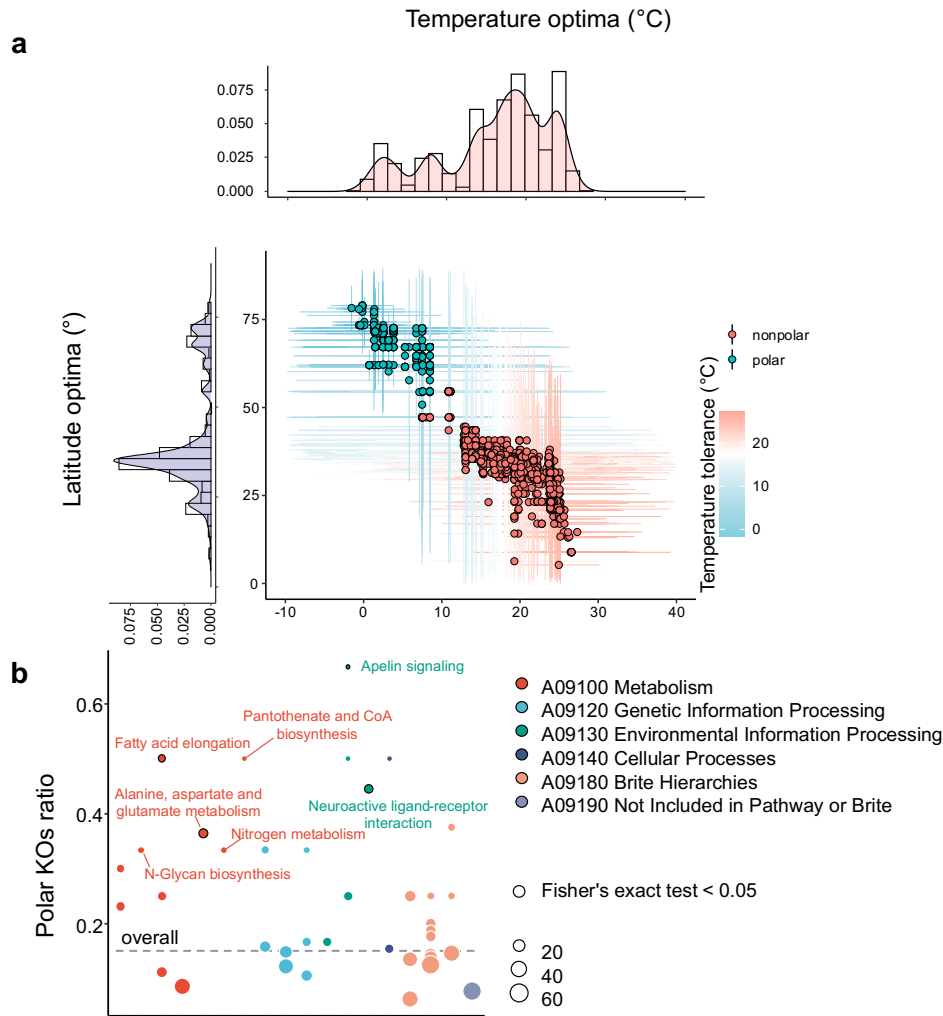

720  
721  
722  
723  
724  
725  
726  
727  
728  
729

**Fig. 3 | Ecological niche of KEGG Orthologs (KOs) and polar-enriched pathways. a,** Distribution of the temperature optima and latitude optima for KEGG Orthologs (KOs) found in viral genomes. Colours of dots represent the Polar or Nonpolar niche for each KO. Bars indicate the tolerance ranges of temperature (horizontal) and latitude (vertical). Histograms show the distributions of temperature and latitude optima. **b,** Ratio of Polar KOs in each pathway. Black-framed circles correspond to pathways in which Polar KOs were significantly enriched ( $P < 0.05$ , Fisher's exact test). The overall ratio of Polar KOs to all KOs is indicated by a dotted line.

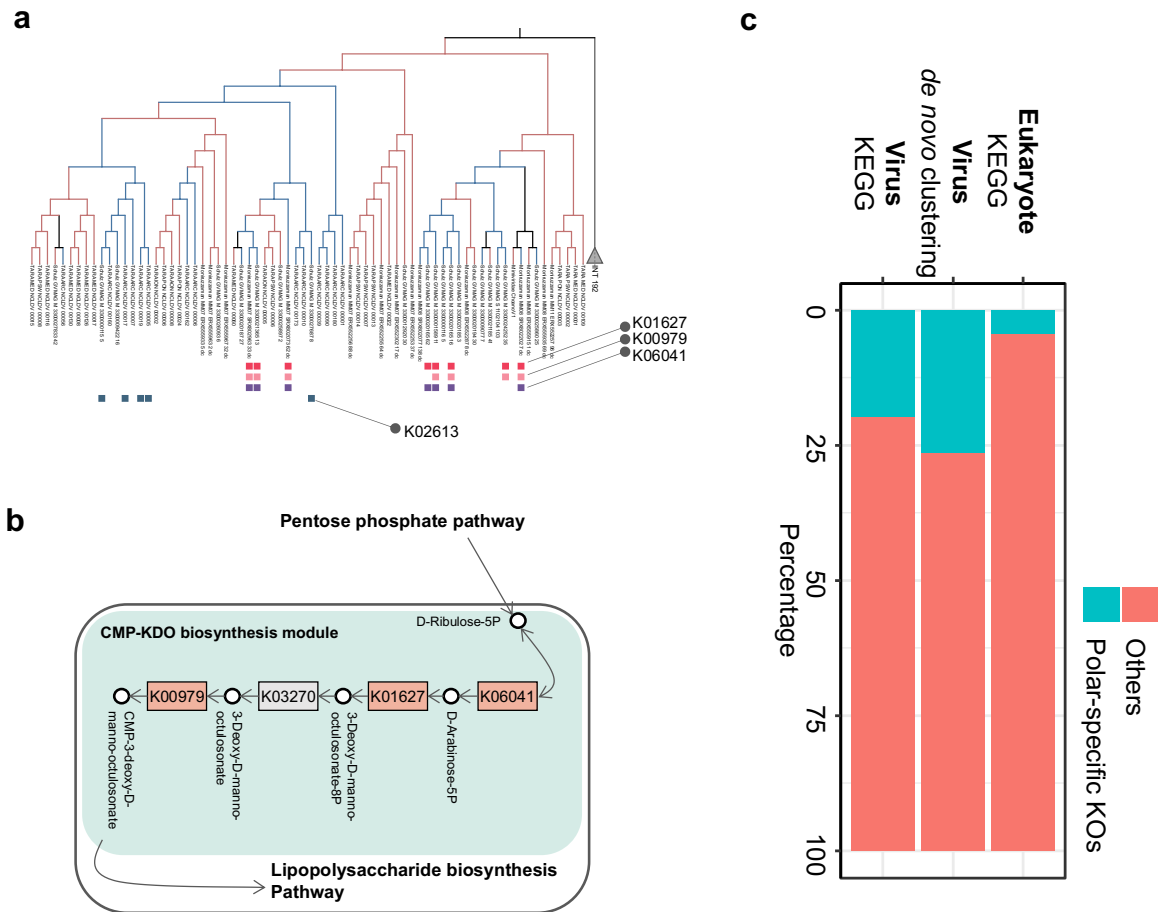

730  
731  
732  
733  
734  
735  
736  
737  
738

**Fig. 4 | Independent genomic adaptation of giant viruses.** 244 functions (KOs) were enriched at individual lineages. One example was given in **a**, Four KOs that were present exclusively in more than five Polar genomes in a selected *Mesomimiviridae* clade. Three of them (K01627, K00979, K06041) were encoded in the same genomes and formed a near-complete CMP–KDO biosynthesis module shown in **b**, Schematic of the three Polar enzymatic steps in the CMP–KDO biosynthesis module. **c**, Proportion of Polar and Nonpolar specific functions (KOs and GCCs) in viruses and eukaryotes.
